# Supplementary material
Source: MDPI journal article supplement (https://www.mdpi.com/2313-5778/3/3/46)

## Supplementary Materials: The Chung Family Tree

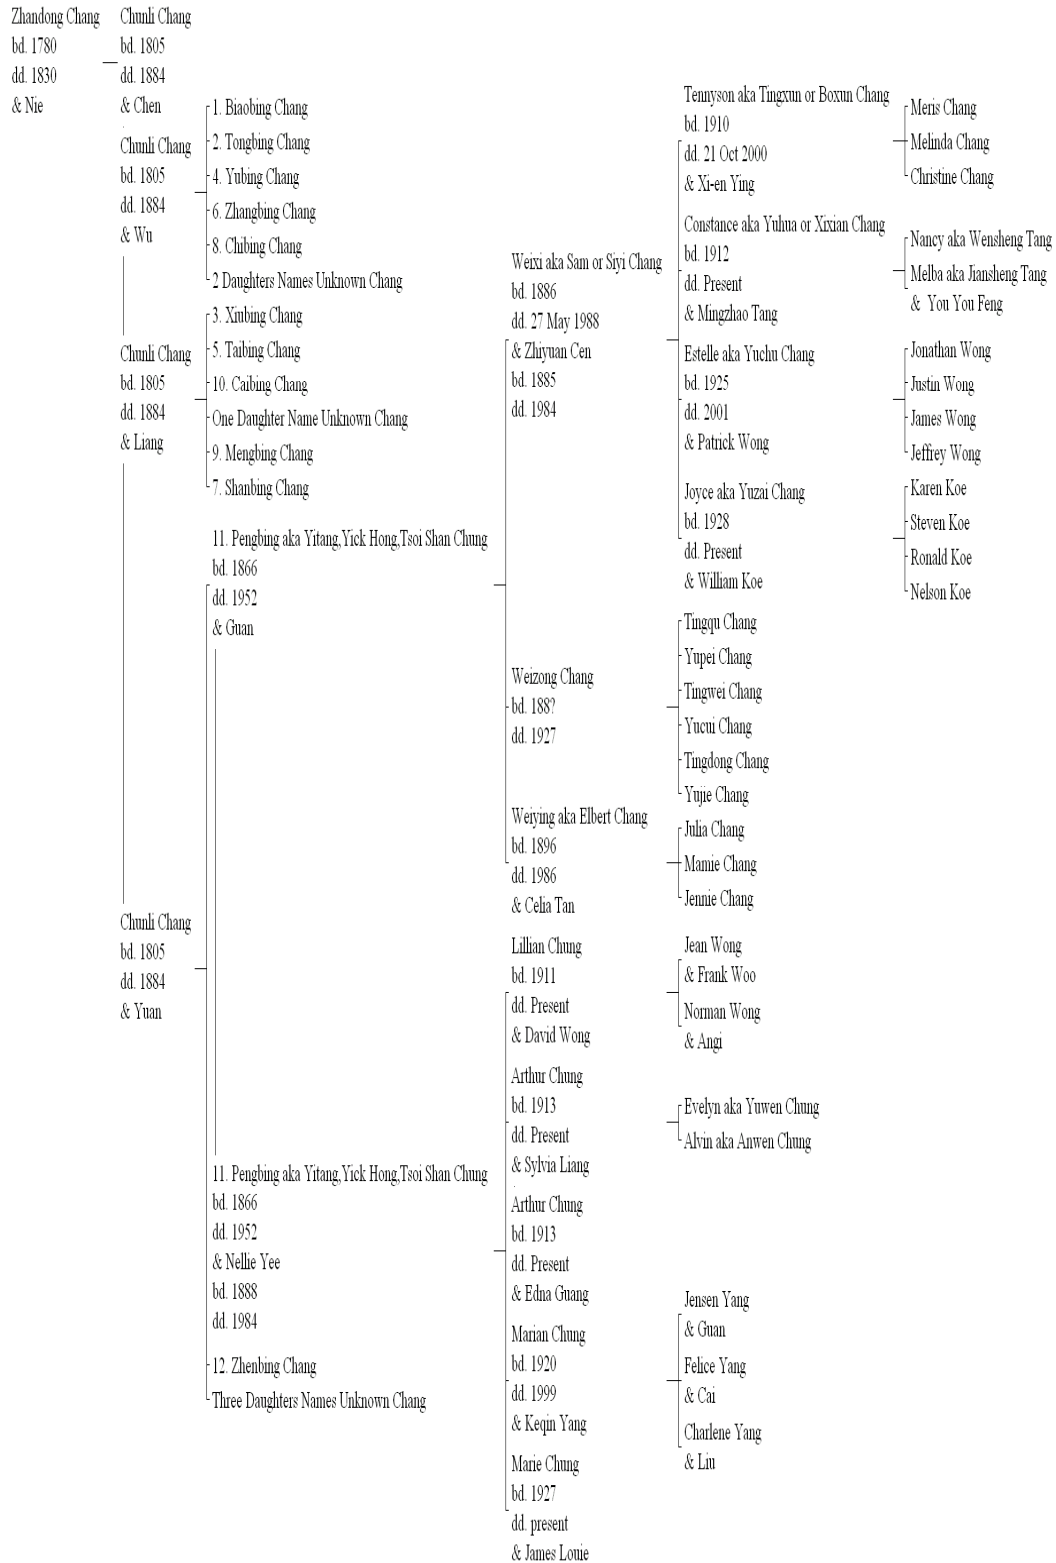

Supplement: s1 [file s1]
